# Supplementary material for: Peripheral natural killer cells in chronic hepatitis B patients display multiple molecular features of T cell exhaustion
Source: eLife. 2021 Jan 28;10:e60095. doi: 10.7554/eLife.60095 (PMC7870135; doi:10.7554/eLife.60095)
Supplement: Supplementary file 1. [file elife-60095-supp1.xlsx]

## Sheet: Feuil1
Human Antigen	Clone	Human Antigen/flurorochromes
2B4	2-69	2B4 PE
CD107a	eBioH4A3	CD107a FITC
CD14	MoP9	CD14 PECF594
CD16	3G8	CD16 BV510
CD160	BY55	CD160 AF488
CD19	HIB19	CD19 PECF594
CD3	SK7	CD3 APC-Cy7
CD3	SK7	CD3 BV605
CD39	TU66	CD39 BV650
CD4	RPA.T4	CD4 PECF594
CD56	NCAM16.2	CD56 APC
CD56	AF127H3	CD56 PE Vio770
CD56	NCAM 16.2	CD56 BV786
CD57	NK-1	CD57 BV421
CD7	M-T701	CD7 BUV395
CD71	M-A712	CD71 BV421
CD98	UM7F8	CD98 PE
DNAM-1	DX11	DNAM-1 BV605
EOMES	WD1928	EOMES PerCP ef710
GRANZYME B	GB11	GRANZYME B AF700
IFNg	4SB3	IFN-g PE
KLRG1	2F1	KLRG1 BV510
LAG-3	3DS223H	LAG-3 PE Cy7
MIP1b	D21.13.51	MIP1b v450
NFAT1	D43B1	NFAT1 AF488
NKG2A	REA110	NKG2A PE Vio770
NKG2C	134591, R&D Systems	NKG2C PE
NKG2D	1D11	NKG2D BV650
NKp30	p30-15	NKp30 BV510
NKp46	9.E2	NKp46 AF700
pAkt S473	M89-61	pAkt PE S473
PD-1	EH12.1	PD-1 BV786
PERFORIN	dG9	PERFORIN BV421
pS6 (pS235/236)	D57.2.2E or D52.2.2E	pS6 (pS235/236) PB
pSTAT5 (pY694)	47/Stat5(pY694)	pSTAT5 PerCPCY5.5 (pY694)
T-BET	O4-46	T-BET BV711
TIGIT	MBSA43	TIGIT PerCPef710
TIM-3	7D3	TIM-3 BB515
TNFa	mAb 11	TNFa PE Cy7
TOX	REA473	TOX PE
streptavidin BV650
